# Supplementary material for: Traditional Chinese Nootropic Medicine Radix Polygalae and Its Active Constituent Onjisaponin B Reduce β-Amyloid Production and Improve Cognitive Impairments
Source: PubMed Central journal article supplement (PMC4782990; doi:10.1371/journal.pone.0151147), 2016-03-08
Supplement: pone.0151147.s001.pdf [file pone.0151147.s001.pdf]

Single Mass Analysis

Tolerance = 5.0 mDa / DBE: min = -1.5, max = 50.0

Element prediction: Off

Number of isotope peaks used for i-FIT = 3

Monoisotopic Mass, Even Electron Ions

1207 formula(e) evaluated with 3 results within limits (up to 20 best isotopic matches for each mass)

Elements Used:

C: 0-500 H: 0-1000 O: 0-200

RAPO-1-3

20160104-10 1418 (11.356) Cm (1399:1418)

1: TOF MS ES-  
5.98e+003

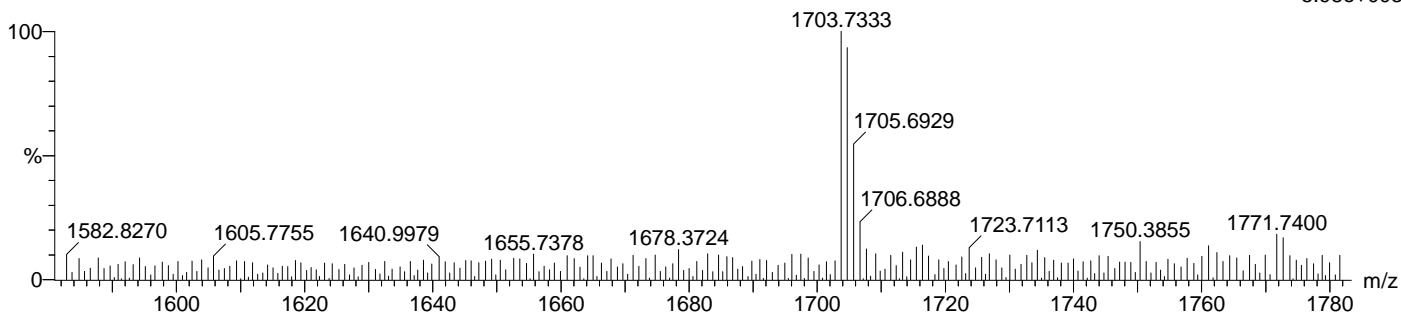

Minimum: -1.5  
Maximum: 5.0 10.0 50.0

| Mass      | Calc. Mass | Mass mDa | PPM  | DBE  | i-FIT | Norm  | Conf(%) | Formula      |
|-----------|------------|----------|------|------|-------|-------|---------|--------------|
| 1703.7333 | 1703.7328  | 0.5      | 0.3  | 21.5 | 27.6  | 0.199 | 81.97   | C80 H119 O39 |
|           | 1703.7364  | -3.1     | -1.8 | 43.5 | 29.2  | 1.751 | 17.36   | C98 H111 O26 |
|           | 1703.7293  | 4.0      | 2.3  | -0.5 | 32.4  | 5.010 | 0.67    | C62 H127 O52 |

Single Mass Analysis

Tolerance = 5.0 mDa / DBE: min = -1.5, max = 50.0

Element prediction: Off

Number of isotope peaks used for i-FIT = 3

Monoisotopic Mass, Even Electron Ions

1017 formula(e) evaluated with 2 results within limits (up to 20 best isotopic matches for each mass)

Elements Used:

C: 0-500 H: 0-130 O: 0-200

RAPO-1-3

20160104-10 1457 (11.670)

1: TOF MS ES-  
1.57e+002

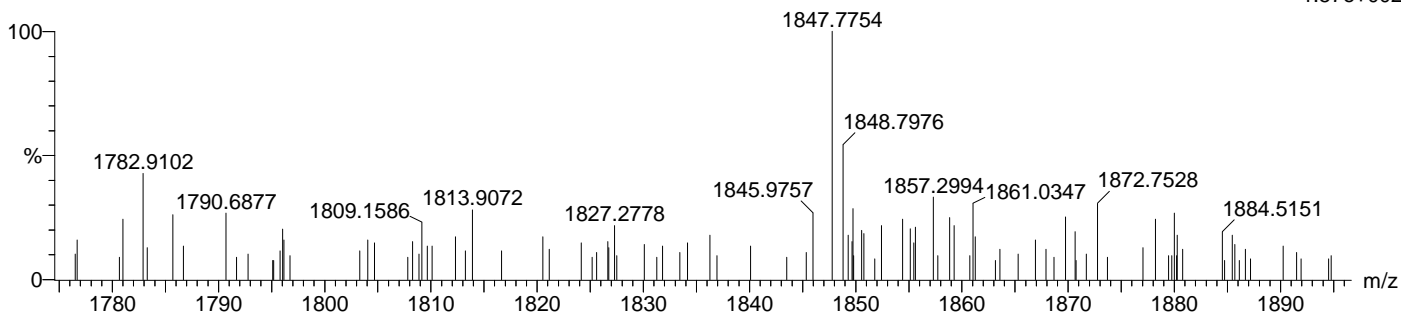

Minimum: -1.5  
Maximum: 5.0 10.0 50.0

| Mass      | Calc. Mass | mDa  | PPM  | DBE  | i-FIT | Norm  | Conf(%) | Formula       |
|-----------|------------|------|------|------|-------|-------|---------|---------------|
| 1847.7754 | 1847.7751  | 0.3  | 0.2  | 23.5 | 37.1  | 0.272 | 76.17   | C86 H127 O43  |
|           | 1847.7786  | -3.2 | -1.7 | 45.5 | 38.2  | 1.434 | 23.83   | C104 H119 O30 |

Single Mass Analysis

Tolerance = 5.0 mDa / DBE: min = -1.5, max = 50.0

Element prediction: Off

Number of isotope peaks used for i-FIT = 3

Monoisotopic Mass, Even Electron Ions

899 formula(e) evaluated with 4 results within limits (up to 20 best isotopic matches for each mass)

Elements Used:

C: 0-500 H: 0-1000 O: 0-200

RAPO-1-3

20160104-10 1483 (11.876) Cm (1476:1486)

1: TOF MS ES-  
4.05e+003

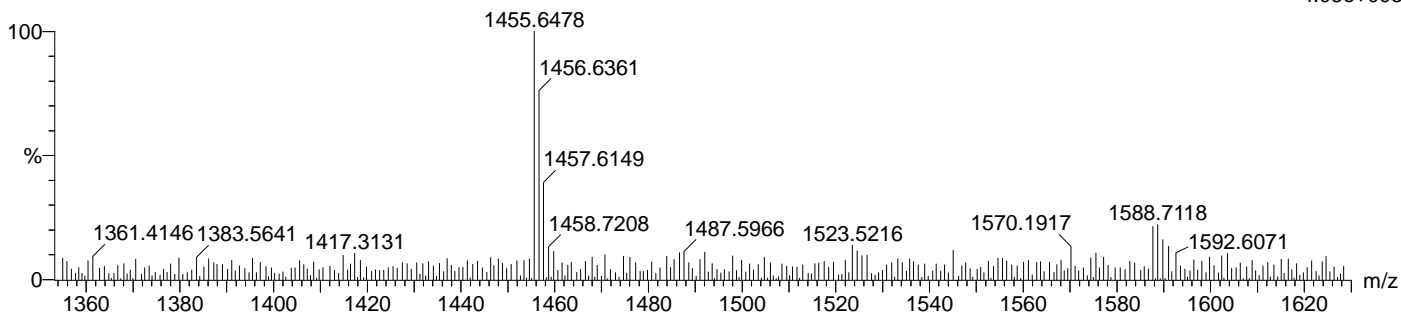

Minimum: -1.5  
Maximum: 5.0 10.0 50.0

| Mass      | Calc. Mass | mDa  | PPM  | DBE  | i-FIT | Norm  | Conf(%) | Formula      |
|-----------|------------|------|------|------|-------|-------|---------|--------------|
| 1455.6478 | 1455.6432  | 4.6  | 3.2  | 19.5 | 21.6  | 0.054 | 94.73   | C70 H103 O32 |
|           | 1455.6491  | -1.3 | -0.9 | 10.5 | 24.9  | 3.376 | 3.42    | C63 H107 O37 |
|           | 1455.6526  | -4.8 | -3.3 | 32.5 | 25.7  | 4.186 | 1.52    | C81 H99 O24  |
|           | 1455.6468  | 1.0  | 0.7  | 41.5 | 27.2  | 5.705 | 0.33    | C88 H95 O19  |

Single Mass Analysis

Tolerance = 5.0 mDa / DBE: min = -1.5, max = 50.0

Element prediction: Off

Number of isotope peaks used for i-FIT = 3

Monoisotopic Mass, Even Electron Ions

1057 formula(e) evaluated with 3 results within limits (up to 20 best isotopic matches for each mass)

Elements Used:

C: 0-500 H: 0-1000 O: 0-200

RAPO-1-3

20160104-10 1568 (12.556) Cm (1560:1568)

1: TOF MS ES-  
4.11e+003

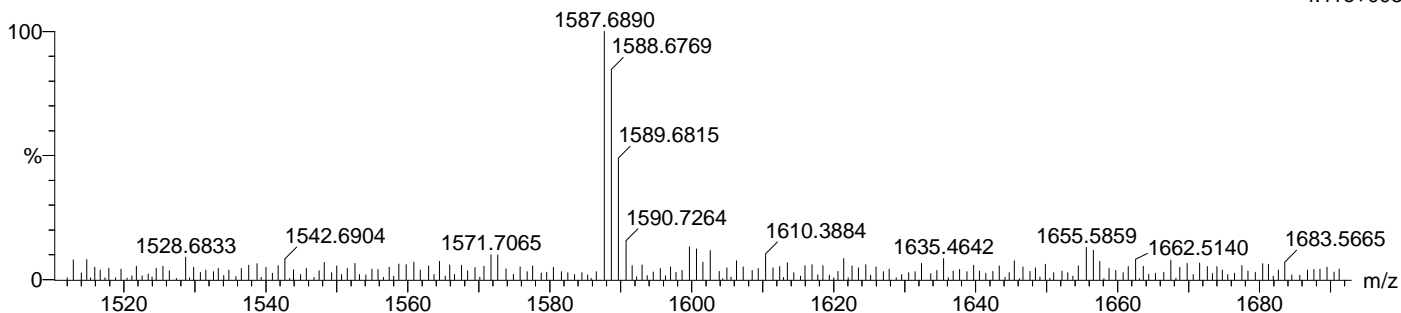

Minimum: -1.5  
Maximum: 5.0 10.0 50.0

| Mass      | Calc. Mass | mDa  | PPM  | DBE  | i-FIT | Norm  | Conf(%) | Formula      |
|-----------|------------|------|------|------|-------|-------|---------|--------------|
| 1587.6890 | 1587.6855  | 3.5  | 2.2  | 20.5 | 21.3  | 0.156 | 85.56   | C75 H111 O36 |
|           | 1587.6890  | 0.0  | 0.0  | 42.5 | 23.5  | 2.354 | 9.50    | C93 H103 O23 |
|           | 1587.6914  | -2.4 | -1.5 | 11.5 | 24.1  | 3.008 | 4.94    | C68 H115 O41 |

Single Mass Analysis

Tolerance = 5.0 mDa / DBE: min = -1.5, max = 50.0

Element prediction: Off

Number of isotope peaks used for i-FIT = 3

Monoisotopic Mass, Even Electron Ions

218 formula(e) evaluated with 1 results within limits (up to 20 best isotopic matches for each mass)

Elements Used:

C: 65-85 H: 0-130 O: 0-70

RAPO-1-3

20160104-10 1621 (12.986) Cm (1614:1637)

1: TOF MS ES-  
7.82e+003

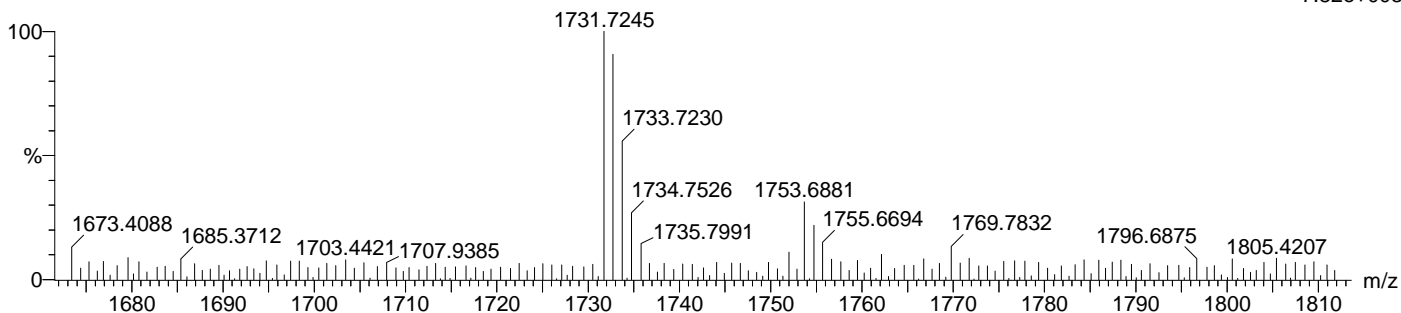

Minimum: -1.5  
Maximum: 5.0 10.0 50.0

| Mass      | Calc. Mass | mDa  | PPM  | DBE  | i-FIT | Norm | Conf(%) | Formula      |
|-----------|------------|------|------|------|-------|------|---------|--------------|
| 1731.7245 | 1731.7278  | -3.3 | -1.9 | 22.5 | 21.3  | n/a  | n/a     | C81 H119 O40 |

Single Mass Analysis

Tolerance = 5.0 mDa / DBE: min = -1.5, max = 50.0

Element prediction: Off

Number of isotope peaks used for i-FIT = 3

Monoisotopic Mass, Even Electron Ions

218 formula(e) evaluated with 2 results within limits (up to 20 best isotopic matches for each mass)

Elements Used:

C: 65-85 H: 0-130 O: 0-70

RAPO-1-3

20160104-10 1869 (14.964) Cm (1862:1872)

1: TOF MS ES-  
8.24e+003

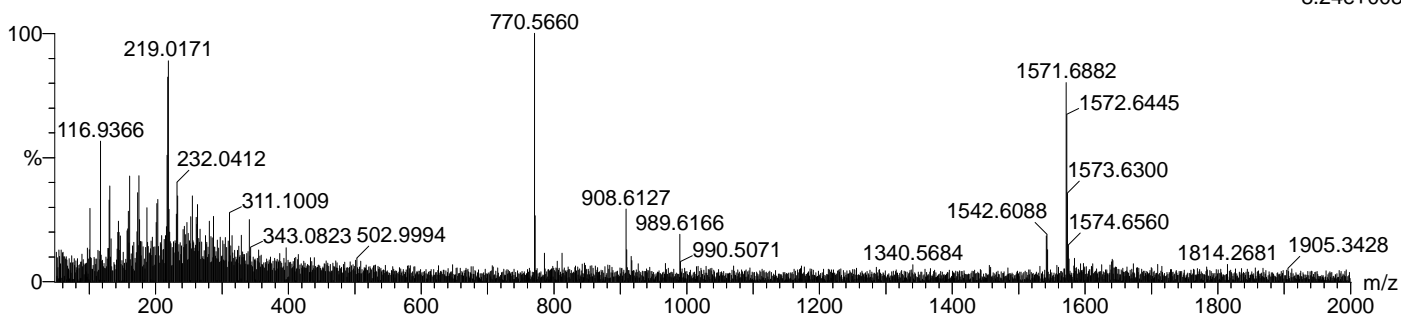

Minimum: -1.5  
Maximum: 5.0 10.0 50.0

| Mass      | Calc. Mass | mDa  | PPM  | DBE  | i-FIT | Norm  | Conf(%) | Formula      |
|-----------|------------|------|------|------|-------|-------|---------|--------------|
| 1571.6882 | 1571.6906  | -2.4 | -1.5 | 20.5 | 24.9  | 0.149 | 86.17   | C75 H111 O35 |
|           | 1571.6847  | 3.5  | 2.2  | 29.5 | 26.7  | 1.978 | 13.83   | C82 H107 O30 |

Single Mass Analysis

Tolerance = 5.0 mDa / DBE: min = -1.5, max = 50.0

Element prediction: Off

Number of isotope peaks used for i-FIT = 3

Monoisotopic Mass, Even Electron Ions

217 formula(e) evaluated with 2 results within limits (up to 20 best isotopic matches for each mass)

Elements Used:

C: 65-85 H: 0-130 O: 0-70

RAPO-1-3

20160104-10 1971 (15.783) Cm (1917:1982)

1: TOF MS ES-  
8.51e+003

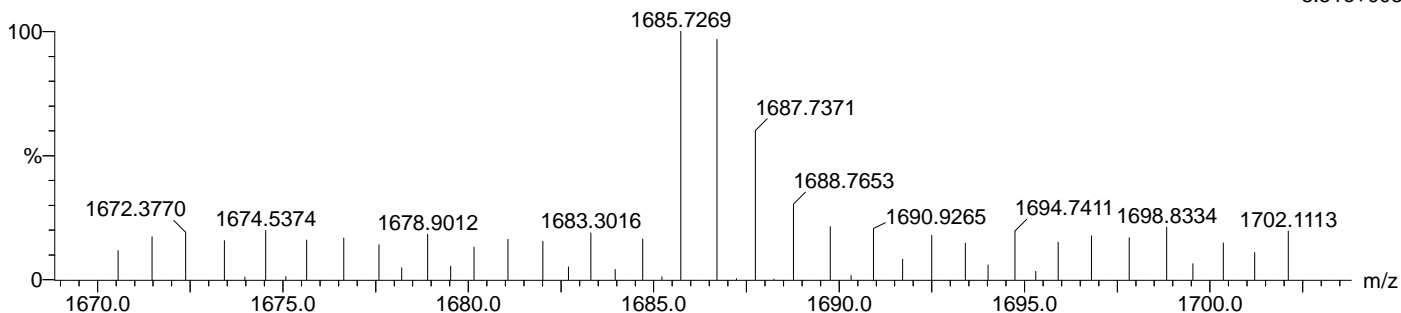

Minimum: -1.5  
Maximum: 5.0 10.0 50.0

| Mass      | Calc. Mass | Mass mDa | PPM  | DBE  | i-FIT | Norm  | Conf(%) | Formula      |
|-----------|------------|----------|------|------|-------|-------|---------|--------------|
| 1685.7269 | 1685.7223  | 4.6      | 2.7  | 22.5 | 33.8  | 0.149 | 86.20   | C80 H117 O38 |
|           | 1685.7282  | -1.3     | -0.8 | 13.5 | 35.6  | 1.980 | 13.80   | C73 H121 O43 |

Single Mass Analysis

Tolerance = 5.0 mDa / DBE: min = -1.5, max = 50.0

Element prediction: Off

Number of isotope peaks used for i-FIT = 3

Monoisotopic Mass, Even Electron Ions

217 formula(e) evaluated with 2 results within limits (up to 20 best isotopic matches for each mass)

Elements Used:

C: 65-85 H: 0-130 O: 0-70

RAPO-1-3

20160104-10 2059 (16.486) Cm (2059:2081)

1: TOF MS ES-  
2.18e+04

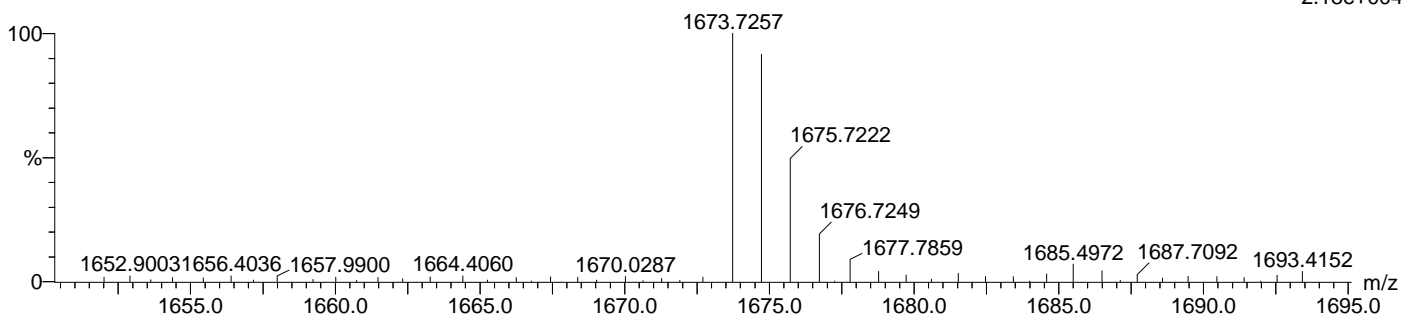

Minimum: -1.5  
Maximum: 5.0 10.0 50.0

| Mass      | Calc. Mass | mDa  | PPM  | DBE  | i-FIT | Norm  | Conf(%) | Formula      |
|-----------|------------|------|------|------|-------|-------|---------|--------------|
| 1673.7257 | 1673.7223  | 3.4  | 2.0  | 21.5 | 20.8  | 0.006 | 99.43   | C79 H117 O38 |
|           | 1673.7282  | -2.5 | -1.5 | 12.5 | 26.0  | 5.167 | 0.57    | C72 H121 O43 |



Single Mass Analysis

Tolerance = 5.0 mDa / DBE: min = -1.5, max = 50.0

Element prediction: Off

Number of isotope peaks used for i-FIT = 3

Monoisotopic Mass, Even Electron Ions

217 formula(e) evaluated with 1 results within limits (up to 20 best isotopic matches for each mass)

Elements Used:

C: 65-85 H: 0-130 O: 0-70

RAPO-1-3

20160104-10 2167 (17.350)

1: TOF MS ES-  
3.04e+002

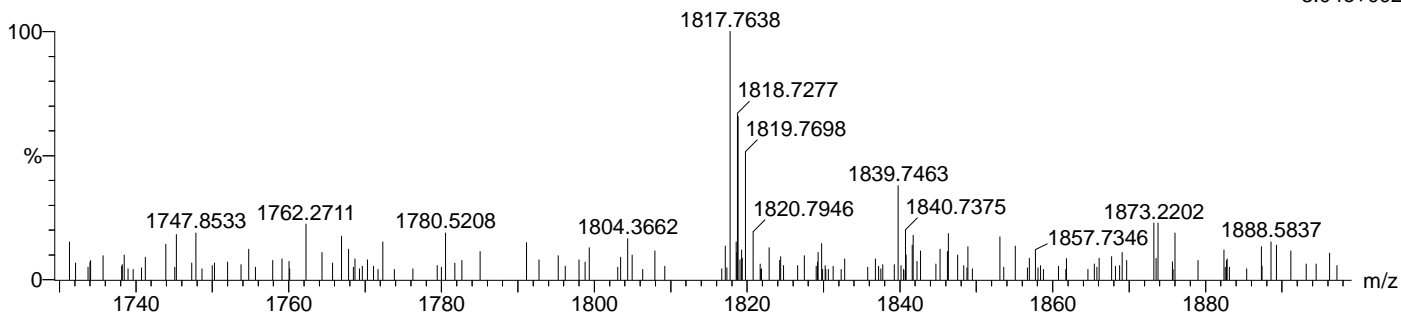

Minimum: -1.5  
Maximum: 5.0 10.0 50.0

| Mass      | Calc. Mass | mDa  | PPM  | DBE  | i-FIT | Norm | Conf(%) | Formula      |
|-----------|------------|------|------|------|-------|------|---------|--------------|
| 1817.7638 | 1817.7645  | -0.7 | -0.4 | 23.5 | 64.7  | n/a  | n/a     | C85 H125 O42 |

Single Mass Analysis

Tolerance = 5.0 mDa / DBE: min = -1.5, max = 50.0

Element prediction: Off

Number of isotope peaks used for i-FIT = 3

Monoisotopic Mass, Even Electron Ions

217 formula(e) evaluated with 1 results within limits (up to 20 best isotopic matches for each mass)

Elements Used:

C: 65-85 H: 0-130 O: 0-70

RAPO-1-3

20160104-10 2376 (19.025)

1: TOF MS ES-  
6.05e+002

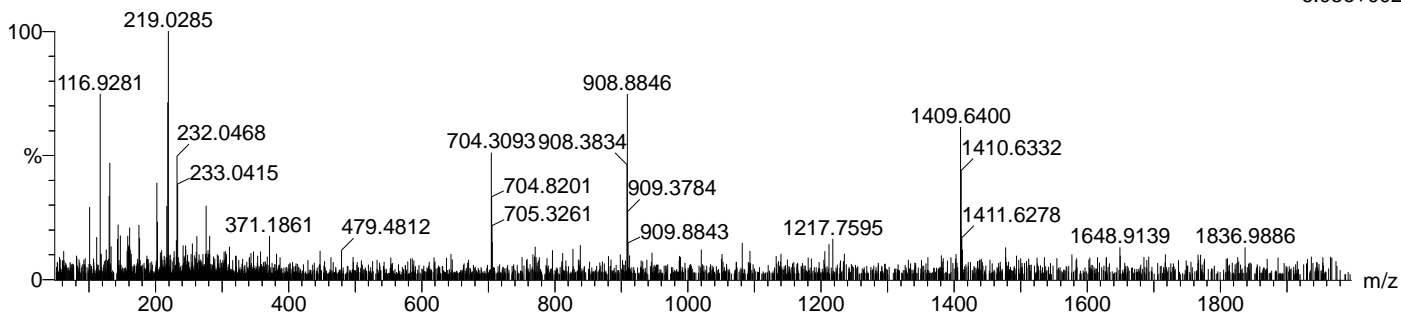

Minimum: -1.5  
Maximum: 5.0 10.0 50.0

| Mass      | Calc. Mass | mDa | PPM | DBE  | i-FIT | Norm | Conf(%) | Formula      |
|-----------|------------|-----|-----|------|-------|------|---------|--------------|
| 1409.6400 | 1409.6378  | 2.2 | 1.6 | 19.5 | 51.6  | n/a  | n/a     | C69 H101 O30 |
