# Supplementary material for: Traditional Chinese Nootropic Medicine Radix Polygalae and Its Active Constituent Onjisaponin B Reduce β-Amyloid Production and Improve Cognitive Impairments
Source: PubMed Central journal article supplement (PMC4782990; doi:10.1371/journal.pone.0151147), 2016-03-08
Supplement: pone.0151147.s008.pdf [file pone.0151147.s008.pdf]

S1 Table. Main compounds identified in RAPO-1-3 by UPLC-ESI-Q-TOF/MS

| Peak      | t <sub>R</sub> (min) | Identification        | [M-H] <sup>-</sup> (m/z) |            | Formula                                          | Error (ppm) |
|-----------|----------------------|-----------------------|--------------------------|------------|--------------------------------------------------|-------------|
|           |                      |                       | Measured                 | Calculated |                                                  |             |
| <b>1</b>  | 11.36                | Onjisaponin A         | 1703.7333                | 1703.7328  | C <sub>80</sub> H <sub>120</sub> O <sub>39</sub> | 0.5         |
| <b>2</b>  | 11.67                | Onjisaponin L         | 1847.7754                | 1847.7751  | C <sub>86</sub> H <sub>128</sub> O <sub>43</sub> | 0.3         |
| <b>3</b>  | 11.88                | Onjisaponin G         | 1455.6478                | 1455.6432  | C <sub>70</sub> H <sub>104</sub> O <sub>32</sub> | 3.2         |
| <b>4</b>  | 12.56                | Onjisaponin F         | 1587.6890                | 1587.6855  | C <sub>75</sub> H <sub>112</sub> O <sub>36</sub> | 2.2         |
| <b>5</b>  | 12.99                | Onjisaponin W         | 1731.7245                | 1731.7278  | C <sub>81</sub> H <sub>120</sub> O <sub>40</sub> | -1.9        |
| <b>6</b>  | 14.96                | Onjisaponin B         | 1571.6882                | 1571.6906  | C <sub>75</sub> H <sub>112</sub> O <sub>35</sub> | -1.5        |
| <b>7</b>  | 15.78                | Onjisaponin Ng        | 1685.7269                | 1685.7223  | C <sub>80</sub> H <sub>118</sub> O <sub>38</sub> | 2.7         |
| <b>8</b>  | 16.49                | Polygalasaponin XXXII | 1673.7257                | 1673.7223  | C <sub>79</sub> H <sub>118</sub> O <sub>38</sub> | 2.0         |
| <b>9</b>  | 17.35                | Onjisaponin J         | 1817.7638                | 1817.7645  | C <sub>85</sub> H <sub>126</sub> O <sub>42</sub> | -0.4        |
| <b>10</b> | 19.03                | Onjisaponin Y         | 1455.6400                | 1409.6378  | C <sub>69</sub> H <sub>102</sub> O <sub>30</sub> | 1.6         |
