# Supplementary material for: Traditional Chinese Nootropic Medicine Radix Polygalae and Its Active Constituent Onjisaponin B Reduce β-Amyloid Production and Improve Cognitive Impairments
Source: PubMed Central journal article supplement (PMC4782990; doi:10.1371/journal.pone.0151147), 2016-03-08
Supplement: pone.0151147.s009.pdf [file pone.0151147.s009.pdf]

S2 Table. The detailed information of the main peak areas in RAPO-1-3

| Peak         | t <sub>R</sub> (min) | Identification        | Area   | Estimated content (%) |
|--------------|----------------------|-----------------------|--------|-----------------------|
| <b>1</b>     | 11.36                | Onjisaponin A         | 97.3   |                       |
| <b>2</b>     | 11.67                | Onjisaponin L         | 35.7   |                       |
| <b>3</b>     | 11.88                | Onjisaponin G         | 83.1   |                       |
| <b>4</b>     | 12.56                | Onjisaponin F         | 219.6  |                       |
| <b>5</b>     | 12.99                | Onjisaponin W         | 88.8   |                       |
| <b>6</b>     | 14.96                | Onjisaponin B         | 292.5  | 2.4                   |
| <b>7</b>     | 15.78                | Onjisaponin Ng        | 53.1   |                       |
| <b>8</b>     | 16.49                | Polygalasaponin XXXII | 322.9  |                       |
| <b>9</b>     | 17.35                | Onjisaponin J         | 249    |                       |
| <b>10</b>    | 19.03                | Onjisaponin Y         | 112.8  |                       |
| <b>Total</b> |                      |                       | 1554.8 | 12.8                  |
